# Supplementary material
Source: PubMed Central journal article supplement (PMC7484391)

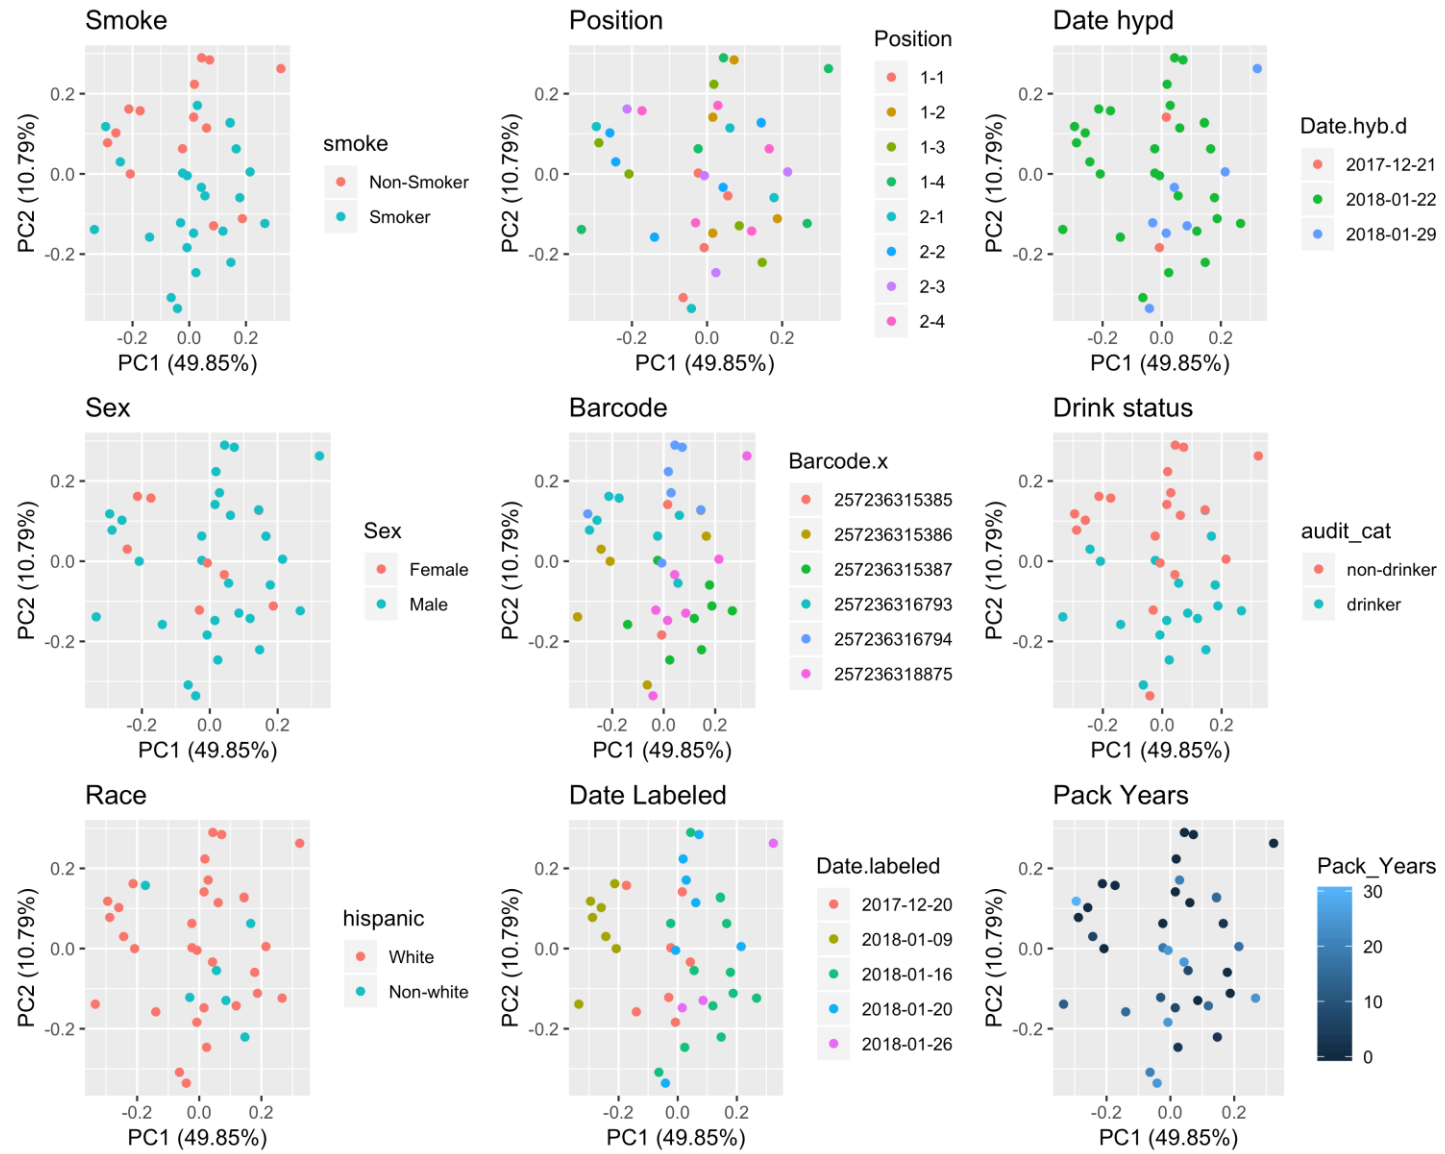

Supplementary Figure 1.

Supplement: NIHMS1615933-supplement-supp_fig1.pdf [file NIHMS1615933-supplement-supp_fig1.pdf]

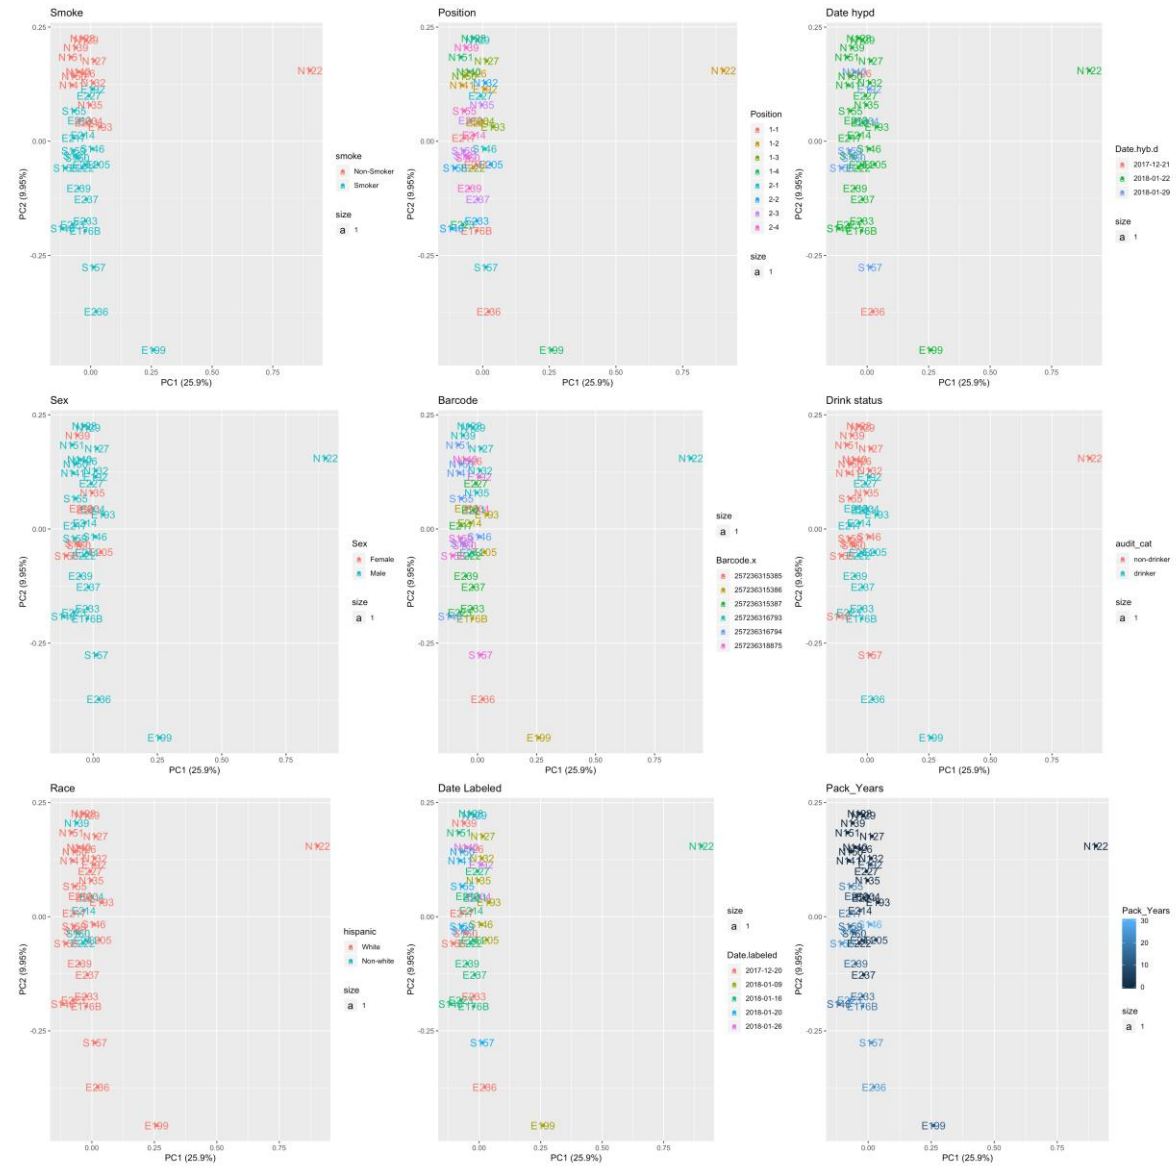

Supplementary Figure 2.

Supplement: NIHMS1615933-supplement-supp_fig2.pdf [file NIHMS1615933-supplement-supp_fig2.pdf]

3A.

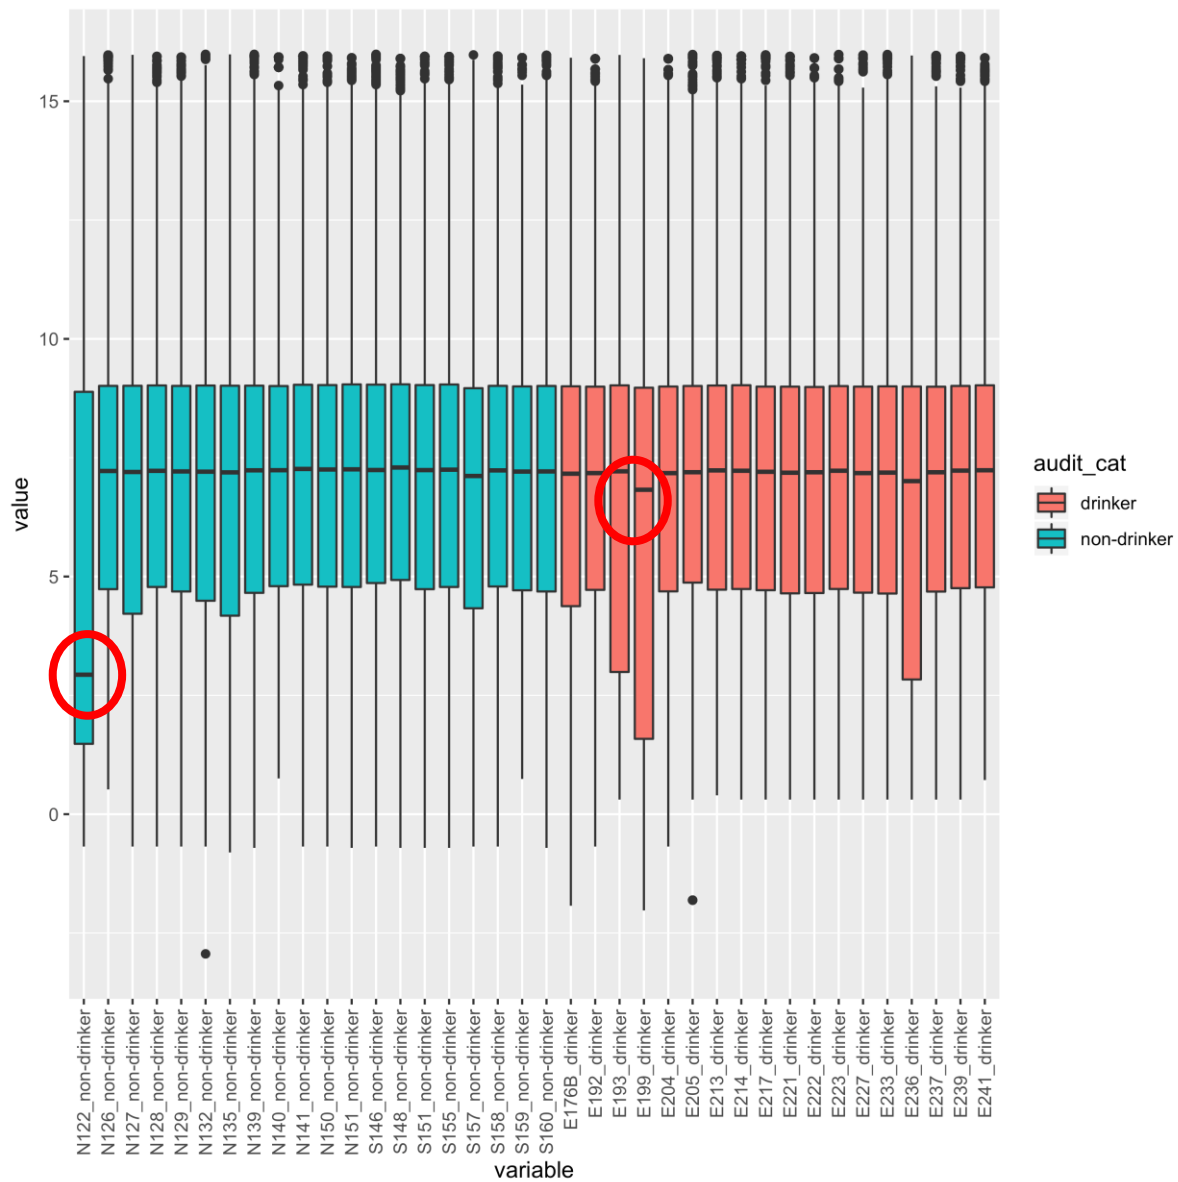

3B.

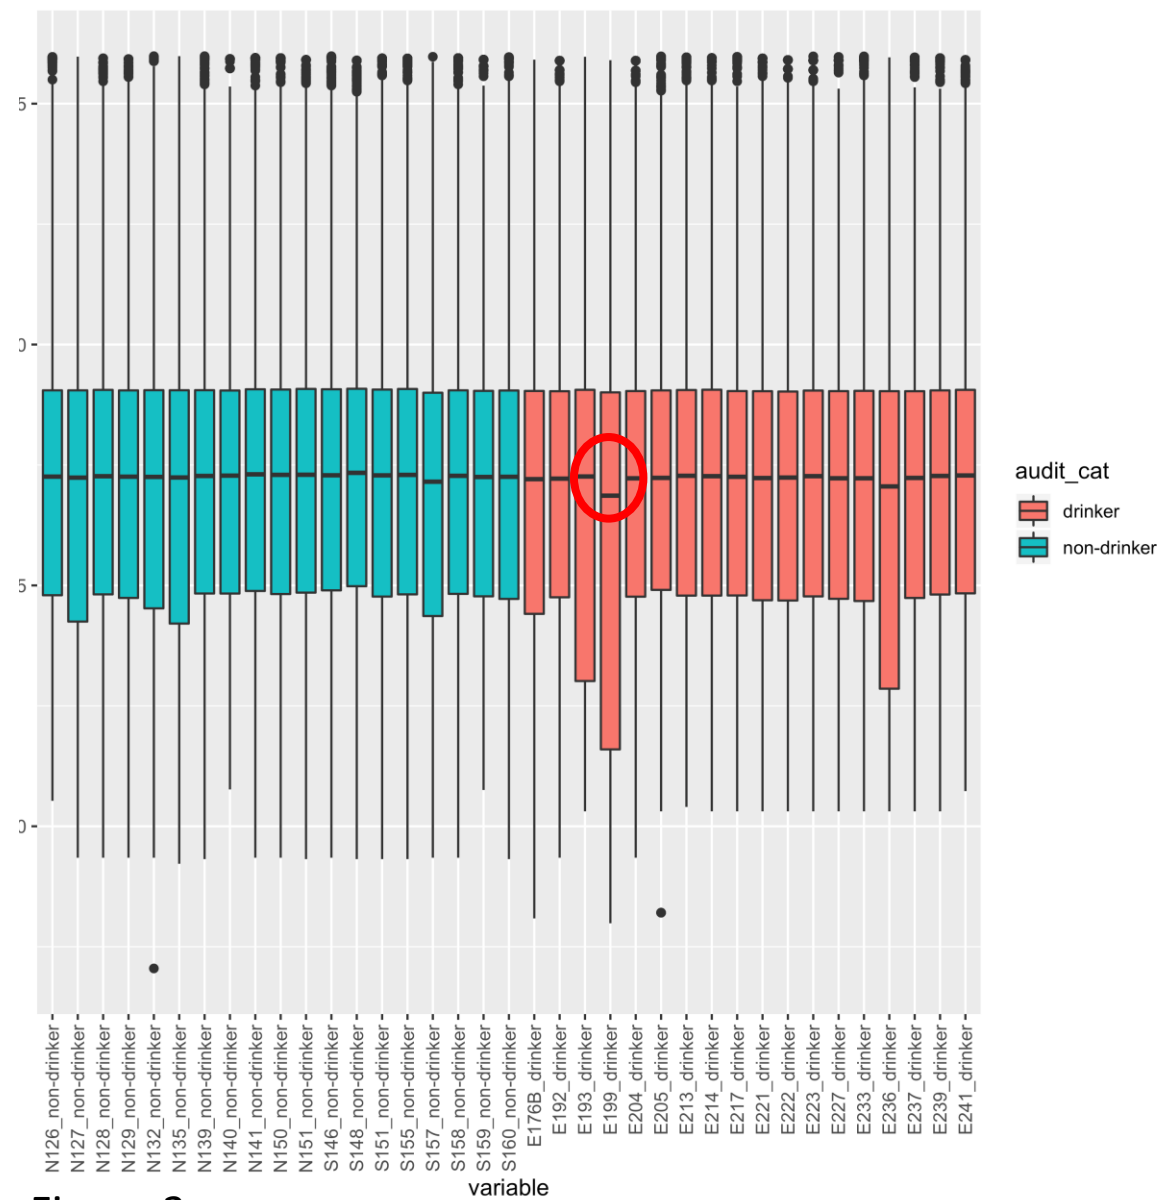

Supplementary Figure 3.

Supplement: NIHMS1615933-supplement-supp_fig3.pdf [file NIHMS1615933-supplement-supp_fig3.pdf]

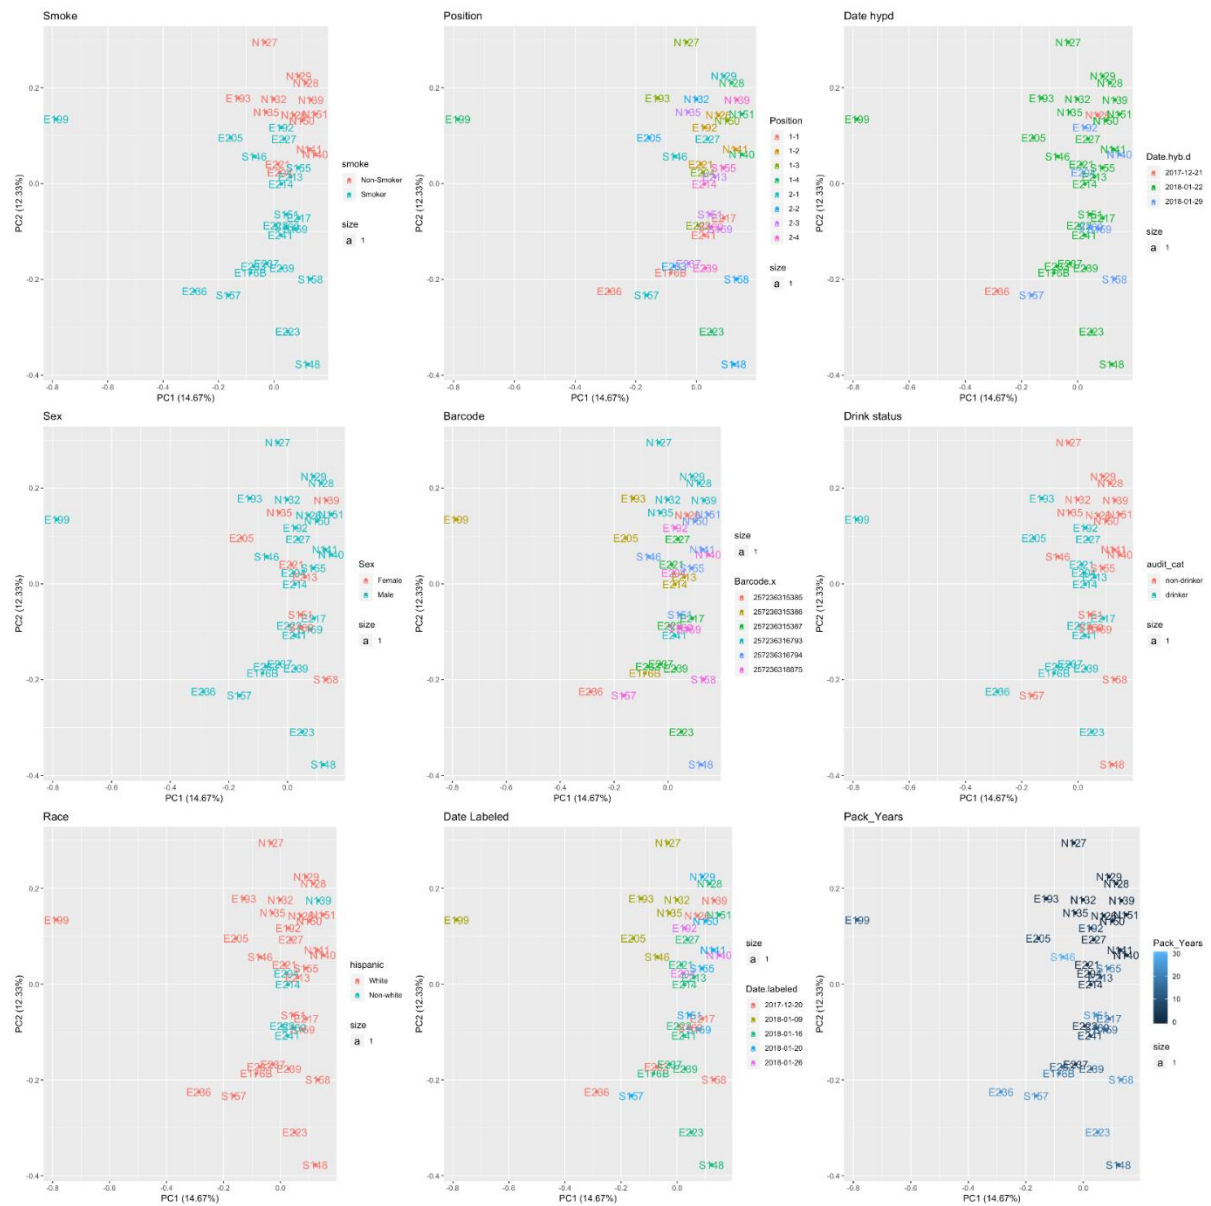

Supplementary Figure 5.

Supplement: NIHMS1615933-supplement-supp_fig5.pdf [file NIHMS1615933-supplement-supp_fig5.pdf]

Control Participants      AUD Participants

Gene      Probe

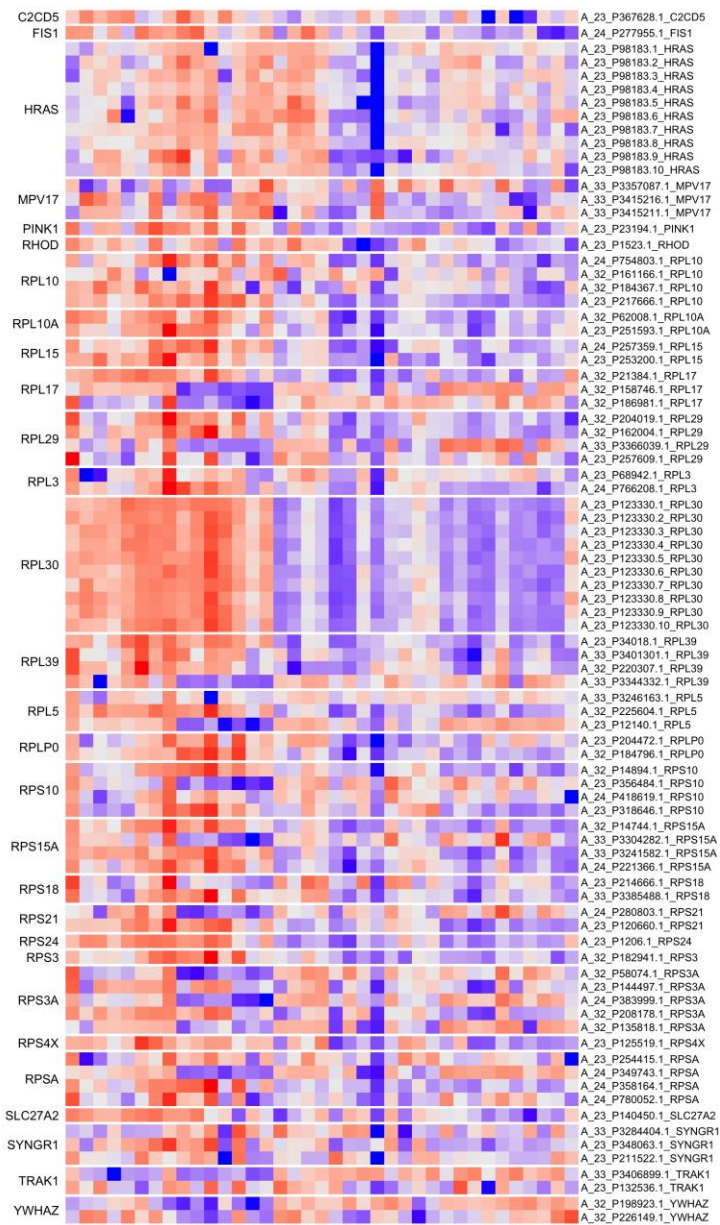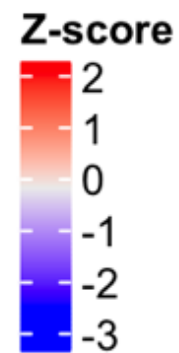

Supplement: NIHMS1615933-supplement-supp_fig7.pdf [file NIHMS1615933-supplement-supp_fig7.pdf]

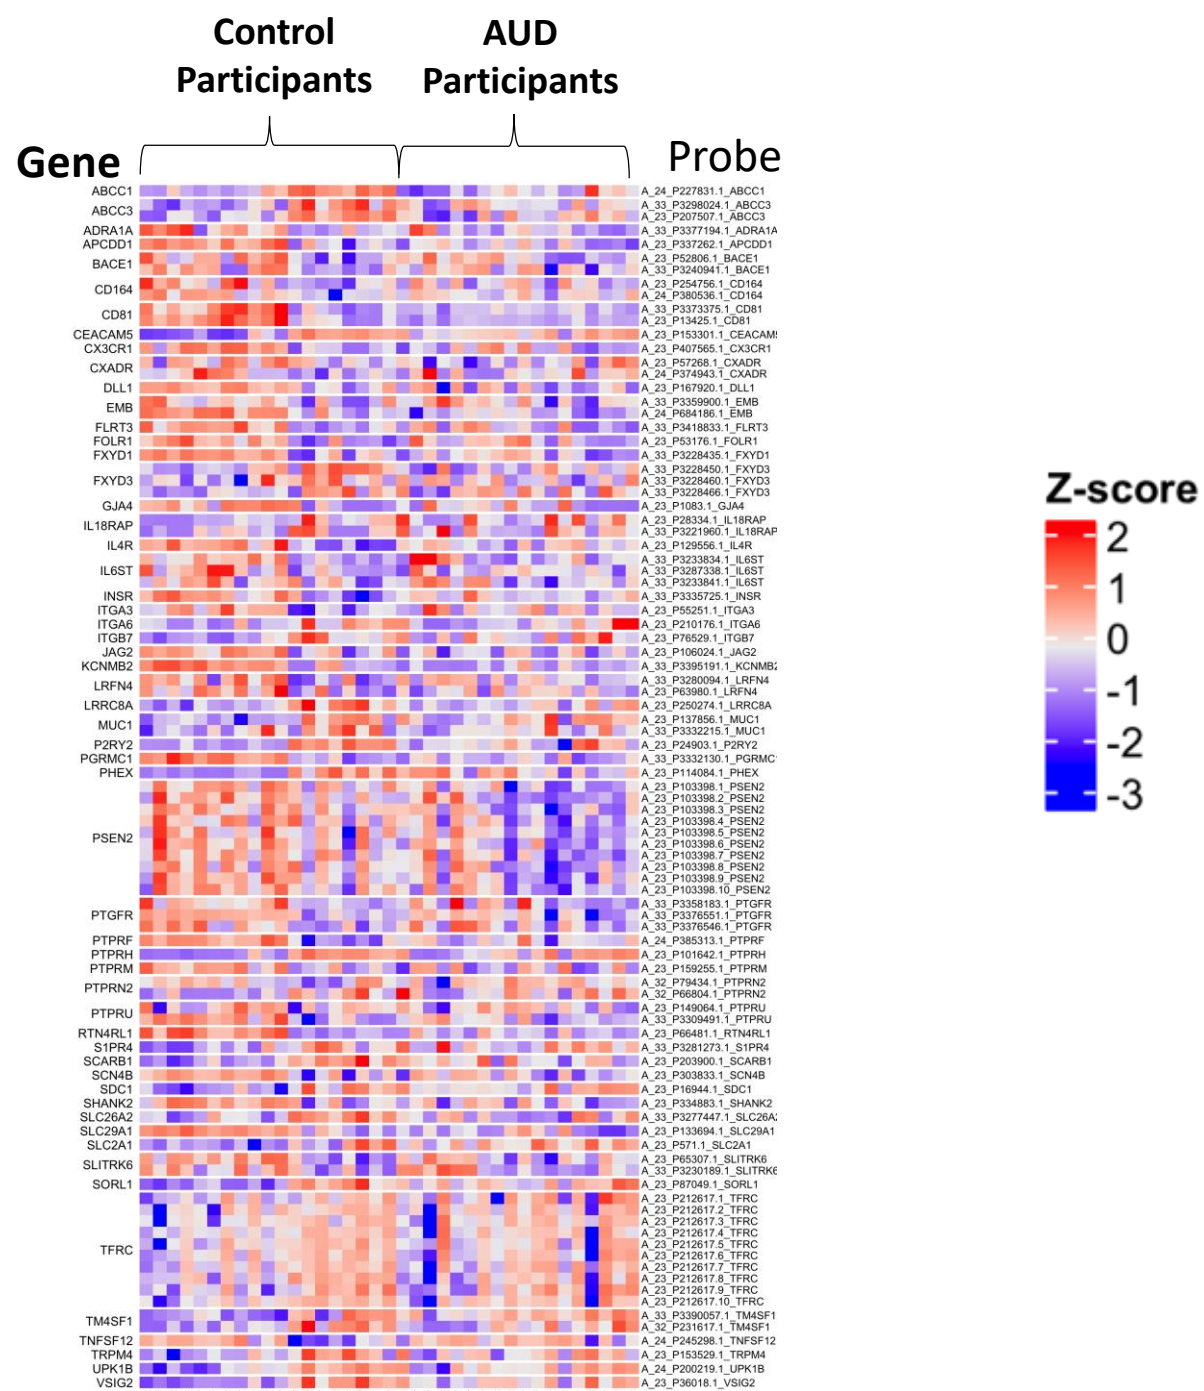

Supplement: NIHMS1615933-supplement-supp_fig9.pdf [file NIHMS1615933-supplement-supp_fig9.pdf]
